# Supplementary material for: Mutational and Topological Analysis of the Escherichia coli BamA Protein
Source: PubMed Central journal article supplement (PMC3871556; doi:10.1371/journal.pone.0084512), 2013-12-23
Supplement: pone.0084512.s001.pdf [file pone.0084512.s001.pdf]

**Table S1. Strains and plasmids used in this work.**

| <b>Bacterial strains.</b>  | <b>Relevant genotype.</b>                                                                                                               | <b>Reference.</b>   |
|----------------------------|-----------------------------------------------------------------------------------------------------------------------------------------|---------------------|
| RLG221                     | <i>E. coli</i> K-12 cloning strain. <i>recA56 araD139 (are-leu)7697 laxX74 glaU galK hsdR strA</i>                                      | R. Gourse           |
| JWD3                       | <i>E. coli</i> K-12 BamA depletion strain.                                                                                              | [19]                |
| BL21(DE3)                  | <i>fhuA2 [lon] ompT gal (λ DE3)[dcm] ΔhsdS</i>                                                                                          | New England BioLabs |
| <b>Bacterial plasmids.</b> |                                                                                                                                         |                     |
| pET17b                     | T7 expression vector (Amp <sup>R</sup> )                                                                                                | Novagen             |
| pET17b/ <i>bamA</i>        | pET17b plasmid which expresses a codon-optimised version of <i>E. coli</i> BamA.                                                        | This Work           |
| pET17b/ <i>6hisbamA</i>    | pET17b plasmid which expresses a 6His tagged codon-optimised version of <i>E. coli</i> BamA. HHHHHHAA was inserted between A21 and E22. | This Work           |
| pET17b/ <i>bamA</i> ΔP1    | BamA POTRA <sub>1</sub> deletion. Amino acids E22 to K89 deleted and an A inserted between A21 and E90.                                 | This Work           |
| pET17b/ <i>bamA</i> ΔP2    | BamA POTRA <sub>2</sub> deletion. Amino acids P92 to G172 deleted.                                                                      | This Work           |
| pET17b/ <i>bamA</i> ΔP3    | BamA POTRA <sub>3</sub> deletion. Amino acids V173 to D264 deleted and an A inserted between G172 and Q265.                             | This Work           |
| pET17b/ <i>bamA</i> ΔP4    | BamA POTRA <sub>4</sub> deletion. Amino acids D264 to N345 deleted and an A inserted between G263 and R346.                             | This Work           |
| pET17b/ <i>bamA</i> ΔP5    | BamA POTRA <sub>5</sub> deletion. Amino acids N345 to R421 deleted.                                                                     | This Work           |
| pET17b/ <i>bamA</i> L2HA   | BamA L2 HA epitope insertion. YPYDVPDYA was inserted between D464 and Y465.                                                             | This Work           |
| pET17b/ <i>bamA</i> L3HA   | BamA L3 HA epitope insertion. YPYDVPDYA was inserted between D498 and A499.                                                             | This Work           |
| pET17b/ <i>bamA</i> L4HA   | BamA L4 HA epitope insertion. YPYDVPDYA was inserted between M552 and G553.                                                             | This Work           |
| pET17b/ <i>bamA</i> L5HA   | BamA L5 HA epitope insertion. YPYDVPDYA was inserted between P602 and G603.                                                             | This Work           |
| pET17b/ <i>bamA</i> L6HA   | BamA L6 HA epitope insertion. YPYDVPDYA was inserted between F648 and Y649.                                                             | This Work           |
| pET17b/ <i>bamA</i> L7HA   | BamA L7 HA epitope insertion. YPYDVPDYA was inserted between Y754 and S755.                                                             | This Work           |
| pET17b/ <i>bamA</i> L8HA   | BamA L8 HA epitope insertion. YPYDVPDYA was inserted between D795 and G796.                                                             | This Work           |
| pET17b/ <i>bamA</i> β1HA   | BamA β1 HA epitope insertion. YPYDVPDYA was inserted between N427 and F428.                                                             | This Work           |
| pET17b/ <i>bamA</i> β2HA   | BamA β2 HA epitope insertion. YPYDVPDYA was inserted between Q441 and A442.                                                             | This Work           |
| pET17b/ <i>bamA</i> β3HA   | BamA β3 HA epitope insertion. YPYDVPDYA was inserted between I458 and N459.                                                             | This Work           |
| pET17b/ <i>bamA</i> β4HA   | BamA β4 HA epitope insertion. YPYDVPDYA was inserted between S472 and V473.                                                             | This Work           |

|                             |                                                                                                                                       |           |
|-----------------------------|---------------------------------------------------------------------------------------------------------------------------------------|-----------|
| pET17b/ <i>bamA</i> β5HA    | BamA β5 HA epitope insertion. YPYDVPDYA was inserted between G486 and G487.                                                           | This Work |
| pET17b/ <i>bamA</i> β6HA    | BamA β6 HA epitope insertion. YPYDVPDYA was inserted between G510 and T511.                                                           | This Work |
| pET17b/ <i>bamA</i> β7HA    | BamA β7 HA epitope insertion. YPYDVPDYA was inserted between Y531 and V532.                                                           | This Work |
| pET17b/ <i>bamA</i> β8HA    | BamA β8 HA epitope insertion. YPYDVPDYA was inserted between N573 and Y574.                                                           | This Work |
| pET17b/ <i>bamA</i> β9HA    | BamA β9 HA epitope insertion. YPYDVPDYA was inserted between N594 and L595.                                                           | This Work |
| pET17b/ <i>bamA</i> β10HA   | BamA β10 HA epitope insertion. YPYDVPDYA was inserted between D614 and T615.                                                          | This Work |
| pET17b/ <i>bamA</i> β11HA   | BamA β11 HA epitope insertion. YPYDVPDYA was inserted between T633 and R634.                                                          | This Work |
| pET17b/ <i>bamA</i> β12HA   | BamA β12 HA epitope insertion. YPYDVPDYA was inserted between S715 and L716.                                                          | This Work |
| pET17b/ <i>bamA</i> β13HA   | BamA β13 HA epitope insertion. YPYDVPDYA was inserted between F738 and W739.                                                          | This Work |
| pET17b/ <i>bamA</i> β14HA   | BamA β14 HA epitope insertion. YPYDVPDYA was inserted between G771 and I772.                                                          | This Work |
| pET17b/ <i>bamA</i> β15HA   | BamA β15 HA epitope insertion. YPYDVPDYA was inserted between F785 and S786.                                                          | This Work |
| pET17b/ <i>bamA</i> β16HA   | BamA β16 HA epitope insertion. YPYDVPDYA was inserted between N805 and I806.                                                          | This Work |
| pET17b/ <i>6hisbamA</i> ΔL3 | 6His tagged BamA L3 deletion. Amino acids Q495 to S502 were deleted and replaced with GGG. HHHHHHAA was inserted between A21 and E22. | This Work |
| pET17b/ <i>6hisbamA</i> ΔL4 | 6His tagged BamA L4 deletion. Amino acids V543 to N563 were deleted and replaced with GGG. HHHHHHAA was inserted between A21 and E22. | This Work |
| pET17b/ <i>6hisbamA</i> ΔL6 | 6His tagged BamA partial L6 deletion. Amino acids S657 to A672 were deleted. HHHHHHAA was inserted between A21 and E22.               | This Work |
| pET17b/ <i>6hisbamA</i> ΔL7 | 6His tagged BamA L7 deletion. Amino acids D746 to P763 were deleted and replaced with GGG. HHHHHHAA was inserted between A21 and E22. | This Work |
| pET17b/ <i>6hisbamA</i> ΔL8 | 6His tagged BamA L8 deletion. Amino acids K792 to A799 were deleted and replaced with GGG. HHHHHHAA was inserted between A21 and E22. | This Work |

---
