# Supplementary material for: Mutational and Topological Analysis of the Escherichia coli BamA Protein
Source: PubMed Central journal article supplement (PMC3871556; doi:10.1371/journal.pone.0084512), 2013-12-23
Supplement: pone.0084512.s002.pdf [file pone.0084512.s002.pdf]

**Table S2. DNA Primers used in this work. Primers (all are shown 5' to 3').**

| <b>Primer name.</b> | <b>Sequence.</b>                                                               |
|---------------------|--------------------------------------------------------------------------------|
| PetPro              | TAATACGACTCACTATAGGG                                                           |
| PetTerm             | GTGGCAGCAGCCAACCTCAGC                                                          |
| BamA1130F           | GAAATGCGTCAGATGGAAGGTGC                                                        |
| BamA1372R           | TCGTTTTTGGTCCCGTTGATACCAAC                                                     |
| 6HisBamA            | GGGGGGCTAGCCACCACCACCACCACCACGCGGCGGAAGGTTTCGTTGTAAAGACATC                     |
| PDA1                | GGGGGGCTAGCGAACGTCCGACCATCGCGTCTATC                                            |
| PDA2                | CTGCTGGTTCAGGTAAAGAACGTGTTTCTGCGGAAATCCAGCAGATC                                |
| PDA3                | CCTGAAACTGGTTTTCCAGGAAGGTGCGCAGTACAAACTGTCTGGTGTGAAG                           |
| PDA4                | CGTTACCGTGAACATCACCGAAGGTGCGCGTTTCTACGTTTCGTAATAATCCG                          |
| PDA5                | CCCGGATCCGGTGTACCCGCGTCCACGTTACACGCG                                           |
| ΔL3                 | CGTCTGTTCTACAACGACTTCGGTGGTGGTACTACACCAACAAATCTTACGG                           |
| ΔL4                 | CTGTCTAACATGCAGCCGACGGGTGGTGGTCTTTCAAACCGACGACTTCACC                           |
| ΔL6                 | CGAAAACCTTCTACGCGGGTGGTGTACTTCCCGCACCAGGCG                                     |
| ΔL7                 | CTGGGACATGGGCACCGTTTGGGGTGGTGGTCTAACATCCGTATGTCTGCG                            |
| ΔL8                 | GTTTTCTTACGCGCAGCCGTTCCGGTGGTGGTGAACAGTTCAGTTCAACATC                           |
| BamHIFw             | CACCGGATCCTTCAACTTCGGTATCGG                                                    |
| XhoIRev             | CCCCTCGAGAGATCTGCCGCCCAAGTCTTGCCG                                              |
| L2HARev             | CAGTTCGCGTAGGTCTGGTAGTAATCTGGTACATCATAACGGATATTCGTCGTTTTTGGTGCCGTTGA           |
| L3HARev             | GTGTAGTCAGACAGGTCCGCGTAATCTGGTACATCATAACGGATATTCGTCGTCGCCCTGGAAAGTCGTT         |
| L4HARev             | GGTAGACGGGTGTTACCGTAATCTGGTACATCATAACGGATATTCATAGAGTACAGGTAACGCC               |
| L5HARev             | GTAGTATTCGTTGTCAGAACC <u>GTAATCTGGTACATCATAACGGATATTC</u> CGGAATGGTAACTTTGCCGG |
| L6HAFw              | GGTGGTAAAGAAATGCCGTTCAATATCCGTATGATGTACCAGATTACTACGAAAACCTTCTACGCGGG           |
| L7HAFw              | ACCAACTGGGACTCTTCTCAGTATGAATATCCGTATGATGTACCAGATTACTCTGGTTACCCGGACTACTCTG      |
| L8HAFw              | GCCGTTCAAAAATACGACGAATATCCGTATGATGTACCAGATTACTCGGTGACAAAGCGGAACAGTTC           |
| β1HAFw              | GGGGGATCCTTCAACGAATATCCGTATGATGTACCAGATTACTTCGGTATCGGTTACGGCACCGAATCTGG        |
| β2HARev             | GTTGTCCTGCTGAACACCCGCGTAATCTGGTACATCATAACGGATATTCCTGGAAAGAAACACCAGATTCCG       |
| β3HARev             | GGTAGTCGTTTTTGGTGCCGTTGTAATCTGGTACATCATAACGGATATTCGATACCAACCGCGTAACCG          |
| β4HARev             | GAAGTACGGGTTGGTAAACGTAATCTGGTACATCATAACGGATATTCAGACAGTTCCGCGTAGGTCTGG          |
| β5HARev             | GTCGTTGTAGAACAGACGACCGTAATCTGGTACATCATAACGGATATTCACCCAGAGAAACACCGTC            |
| β6HARev             | GGAAACCCAGGGTAACGTCGGTGAATCTGGTACATCATAACGGATATTCGCCGTAAGATTTGTTGGTGA          |

β7HARev GTTAGACAGAGAGTTGTGAACGTAATCTGGTACATCATAACGGATATTCGTAACCCAGACCCGCACGCAG  
β8HARev TTGTTGTAGGTCCAACCGTAGTAATCTGGTACATCATAACGGATATTCGTTGAAGGTGAAGTCGTCGGTTTT  
β9HARev GAATGGTAACTTTGCCGGTCAGGTAATCTGGTACATCATAACGGATATTCGTTACACGAGAACCGTC  
β10HARev CAATCGGAACGTAGGTCGCGGTGTAATCTGGTACATCATAACGGATATTCGTCCAGGGTAACTTTGTAGTA  
β11HARev ACCGTCACCGTAACCCCAACGGTAATCTGGTACATCATAACGGATATTCGGTACGACCCAGAACAACCCA  
β12HAFw AACGCGATGGCGGTTGCGTCTGAATATCCGTATGATGTACCAGATTACCTGGAATTTATCACCCCGAC  
β13HAFw CTCTGTTTCGTACCTCTTTCTTCGAATATCCGTATGATGTACCAGATTACTGGGACATGGGCACCGTTTTGG  
β14HAFw AACATCCGTATGTCTGCGGGTGAATATCCGTATGATGTACCAGATTACATCGCGCTGCAATGGATGTC  
β15HAFw CCGCTGGGGCCCCTGGTTTTTCGAATATCCGTATGATGTACCAGATTACTCTTACGCGCAGCCGTTCAA  
β16HAFw GCGGAACAGTTCCAGTTCAACGAATATCCGTATGATGTACCAGATTACATCGGTAACCTGGTAATGAGG

---
