# Supplementary material for: Mutational and Topological Analysis of the Escherichia coli BamA Protein
Source: PubMed Central journal article supplement (PMC3871556; doi:10.1371/journal.pone.0084512), 2013-12-23
Supplement: pone.0084512.s003.pdf [file pone.0084512.s003.pdf]

**Table S3. Linker scanning insertions in BamA.**

| Location of 5 amino acid insertions within BamA. | BamA structure affected. | Growth in absence of arabinose. <sup>a)</sup> | Maximum vancomycin concentration allowing growth. <sup>b)</sup> |
|--------------------------------------------------|--------------------------|-----------------------------------------------|-----------------------------------------------------------------|
| pET17b                                           | n/a                      | -                                             | -                                                               |
| <i>bamA</i>                                      | n/a                      | +                                             | 150                                                             |
| A2                                               | Signal Sequence          | +                                             | 37.5                                                            |
| I8                                               | Signal Sequence          | +                                             | 150                                                             |
| L12 <sup>c)</sup>                                | Signal Sequence          | +/-                                           | 0                                                               |
| L12 <sup>c)</sup>                                | Signal Sequence          | +                                             | 150                                                             |
| S15                                              | Signal Sequence          | +                                             | 37.5                                                            |
| H30                                              | POTRA 1                  | +                                             | 150                                                             |
| F31                                              | POTRA 1                  | +                                             | 37.5                                                            |
| P47                                              | POTRA 1                  | +                                             | 150                                                             |
| T69                                              | POTRA 1                  | +                                             | 75                                                              |
| K89                                              | POTRA 1                  | +                                             | 37.5                                                            |
| I97                                              | POTRA 2                  | +                                             | 75                                                              |
| S100                                             | POTRA 2                  | +                                             | 75                                                              |
| G118                                             | POTRA 2                  | +                                             | 150                                                             |
| L137                                             | POTRA 2                  | +                                             | 37.5                                                            |
| F140                                             | POTRA 2                  | -                                             | -                                                               |
| Y141                                             | POTRA 2                  | +/-                                           | 0                                                               |
| V144                                             | POTRA 2                  | +                                             | 37.5                                                            |
| G145                                             | POTRA 2                  | +                                             | 0                                                               |
| K146                                             | POTRA 2                  | +                                             | 0                                                               |
| T156                                             | POTRA 2                  | +                                             | 75                                                              |
| L158                                             | POTRA 2                  | +                                             | 75                                                              |
| Q170                                             | POTRA 2                  | +                                             | 0                                                               |
| S174                                             | POTRA 3                  | +                                             | 37.5                                                            |
| N181                                             | POTRA 3                  | -                                             | -                                                               |
| G184                                             | POTRA 3                  | +                                             | 150                                                             |
| S195                                             | POTRA 3                  | +                                             | 150                                                             |
| L199                                             | POTRA 3                  | +                                             | 75                                                              |
| L231                                             | POTRA 3                  | +/-                                           | 0                                                               |
| R237                                             | POTRA 3                  | +/-                                           | 0                                                               |
| P249                                             | POTRA 3                  | +                                             | 75                                                              |
| T257                                             | POTRA 3                  | -                                             | -                                                               |
| G293                                             | POTRA 4                  | +                                             | 150                                                             |
| N297                                             | POTRA 4                  | +                                             | 75                                                              |
| G298                                             | POTRA 4                  | +                                             | 75                                                              |
| Y315                                             | POTRA 4                  | +                                             | 75                                                              |
| Y317                                             | POTRA 4                  | +                                             | 37.5                                                            |
| R321                                             | POTRA 4                  | +                                             | 75                                                              |
| M325                                             | POTRA 4                  | +                                             | 75                                                              |
| N329                                             | POTRA 4                  | +                                             | 75                                                              |
| D332                                             | POTRA 4                  | +                                             | 75                                                              |
| N340                                             | POTRA 4                  | +                                             | 75                                                              |
| A343                                             | POTRA 4                  | +                                             | 75                                                              |
| F354                                             | POTRA 5                  | +                                             | 75                                                              |

**Table S3. Continued**

| <b>Location of 5 amino acid insertion in BamA.</b> | <b>BamA secondary structure affected.</b> | <b>Growth in absence of arabinose. <sup>a)</sup></b> | <b>Maximum vancomycin concentration allowing growth. <sup>b)</sup></b> |
|----------------------------------------------------|-------------------------------------------|------------------------------------------------------|------------------------------------------------------------------------|
| M372                                               | POTRA 5                                   | +                                                    | 37.5                                                                   |
| Q384                                               | POTRA 5                                   | +                                                    | 37.5                                                                   |
| D399                                               | POTRA 5                                   | +                                                    | 75                                                                     |
| G437                                               | Loop 1                                    | +                                                    | 37.5                                                                   |
| Q441                                               | Beta 2                                    | -                                                    | -                                                                      |
| G443                                               | Beta 2                                    | -                                                    | -                                                                      |
| G457                                               | Beta 3                                    | +                                                    | 37.5                                                                   |
| N459                                               | Beta 3                                    | +                                                    | 0                                                                      |
| Q466                                               | Loop 2/ Beta 4                            | -                                                    | -                                                                      |
| V480                                               | Turn 2                                    | +                                                    | 150                                                                    |
| D503                                               | Loop 3/ Beta 6                            | -                                                    | -                                                                      |
| Y504                                               | Beta 6                                    | +                                                    | 37.5                                                                   |
| Y509                                               | Beta 6                                    | -                                                    | -                                                                      |
| G516                                               | Beta 6                                    | +                                                    | 0                                                                      |
| P518                                               | Turn 3                                    | +                                                    | 75                                                                     |
| L529                                               | Beta 7                                    | +                                                    | 0                                                                      |
| W546                                               | Loop 4                                    | +                                                    | 0                                                                      |
| P556                                               | Loop 4                                    | +                                                    | 150                                                                    |
| Y574                                               | Beta 8                                    | -                                                    | -                                                                      |
| G575                                               | Beta 8                                    | +                                                    | 37.5                                                                   |
| Y578                                               | Beta 8                                    | +                                                    | 37.5                                                                   |
| I601                                               | Loop 5                                    | +                                                    | 75                                                                     |
| L613                                               | Beta 10                                   | -                                                    | -                                                                      |
| G638                                               | Beta 11/ Loop 6                           | +                                                    | 75                                                                     |
| G643                                               | Loop 6                                    | +                                                    | 75                                                                     |
| G656                                               | Loop 6                                    | +                                                    | 75                                                                     |
| V660                                               | Loop 6                                    | +                                                    | 75                                                                     |
| Q664                                               | Loop 6                                    | +/-                                                  | 0                                                                      |
| N666                                               | Loop 6                                    | -                                                    | -                                                                      |
| P676                                               | Loop 6                                    | +                                                    | 75                                                                     |
| P684                                               | Loop 6                                    | +                                                    | 150                                                                    |
| D685                                               | Loop 6                                    | +                                                    | 75                                                                     |
| Y686                                               | Loop 6                                    | +                                                    | 150                                                                    |
| A714                                               | Beta 12                                   | -                                                    | -                                                                      |
| P723                                               | Turn 6                                    | +                                                    | 37.5                                                                   |
| S726                                               | Turn 6                                    | +                                                    | 75                                                                     |
| D727                                               | Turn 6                                    | +                                                    | 75                                                                     |
| R734                                               | Beta 13                                   | +                                                    | 0                                                                      |
| P758                                               | Loop 7                                    | +                                                    | 150                                                                    |
| A770                                               | Beta 14                                   | -                                                    | -                                                                      |
| Q789                                               | Beta 15                                   | -                                                    | -                                                                      |
| G796                                               | Loop 8                                    | +                                                    | 37.5                                                                   |
| A799                                               | Loop 8                                    | -                                                    | -                                                                      |
| W810                                               | Beta 16                                   | +                                                    | 75                                                                     |

- a) The growth of the depletion strain JWD3, carrying either pET17b, pET17b/ *bamA* or pET17b/ *bamA* containing various insertions in *bamA*, was investigated by streaking bacteria onto nutrient agar plates supplemented with only 100  $\mu\text{g ml}^{-1}$  ampicillin. Plates were incubated overnight at 37 °C and strains were scored as follows: +, normal growth; +/-, weak growth; -, no growth. The results shown were determined from three independent experiments.
- b) JWD3 cells carrying pET17b/ *bamA*, containing various insertions in *bamA*, were struck out onto LB agar plates supplemented with 100  $\mu\text{g ml}^{-1}$  ampicillin and 0, 37.5, 75 and 150  $\mu\text{g ml}^{-1}$  vancomycin. Plates were incubated overnight at 37 °C. No growth on plates without vancomycin is indicated as -. The results shown were determined from three independent experiments.
- c) Due to the location of the insertion site these two constructs have different amino acid insertions after position L12.
