# Supplementary material for: Mutational and Topological Analysis of the Escherichia coli BamA Protein
Source: PubMed Central journal article supplement (PMC3871556; doi:10.1371/journal.pone.0084512), 2013-12-23
Supplement: pone.0084512.s005.pdf [file pone.0084512.s005.pdf]

**Table S5. HA insertions in BamA.**

| Location of HA epitopes within BamA. | BamA structure affected. | Growth in absence of arabinose. <sup>a)</sup> | Maximum vancomycin concentration allowing growth. <sup>b)</sup> |
|--------------------------------------|--------------------------|-----------------------------------------------|-----------------------------------------------------------------|
| pET17b                               | n/a                      | -                                             | -                                                               |
| <i>bamA</i>                          | n/a                      | +                                             | 150                                                             |
| D464                                 | Loop 2                   | -                                             | -                                                               |
| D498                                 | Loop 3                   | +/-                                           | 0                                                               |
| M552                                 | Loop 4                   | +                                             | 150                                                             |
| P602                                 | Loop 5                   | +                                             | 0                                                               |
| F648                                 | Loop 6                   | -                                             | -                                                               |
| Y754                                 | Loop 7                   | +                                             | 150                                                             |
| D795                                 | Loop 8                   | -                                             | -                                                               |
| N427                                 | Beta 1                   | -                                             | -                                                               |
| Q441                                 | Beta 2                   | -                                             | -                                                               |
| I458                                 | Beta 3                   | -                                             | -                                                               |
| S472                                 | Beta 4                   | -                                             | -                                                               |
| G486                                 | Beta 5                   | +/-                                           | 0                                                               |
| G510                                 | Beta 6                   | -                                             | -                                                               |
| Y531                                 | Beta 7                   | -                                             | -                                                               |
| N573                                 | Beta 8                   | -                                             | -                                                               |
| N594                                 | Beta 9                   | -                                             | -                                                               |
| D614                                 | Beta 10                  | -                                             | -                                                               |
| T633                                 | Beta 11                  | -                                             | -                                                               |
| S715                                 | Beta 12                  | -                                             | -                                                               |
| F738                                 | Beta 13                  | -                                             | -                                                               |
| G771                                 | Beta 14                  | -                                             | -                                                               |
| F785                                 | Beta 15                  | -                                             | -                                                               |
| N805                                 | Beta 16                  | -                                             | -                                                               |

<sup>a)</sup> The growth of the depletion strain JWD3, carrying either pET17b, pET17b/ *bamA* or pET17b/ *bamA* containing various HA epitope insertions in *bamA*, was investigated by streaking bacteria onto nutrient agar plates supplemented with only 100  $\mu\text{g ml}^{-1}$  ampicillin. Plates were incubated overnight at 37 °C and strains were scored as follows: +, normal growth; +/-, weak growth; -, no growth. The results shown were determined from three independent experiments. The HA epitope encodes for the peptide sequence YPYDVPDYA.

<sup>b)</sup> JWD3 cells carrying pET17b/ *bamA*, containing various HA insertions in *bamA*, were struck out onto LB agar plates supplemented with 100  $\mu\text{g ml}^{-1}$  ampicillin and 0, 37.5, 75 and 150  $\mu\text{g ml}^{-1}$  vancomycin. Plates were incubated overnight at 37 °C. No growth on plates without vancomycin is indicated as -. The results shown were determined from three independent experiments.
