# Supplementary material for: Mutational and Topological Analysis of the Escherichia coli BamA Protein
Source: PubMed Central journal article supplement (PMC3871556; doi:10.1371/journal.pone.0084512), 2013-12-23
Supplement: pone.0084512.s007.pdf [file pone.0084512.s007.pdf]

**Fig. S1.**

**CATATG**CGGATGAAAAAACTGCTGATCGCGTCTCTGCTGTTCTCTTCTGCGACCGTTTACGGT**GCTAG**  
CGAAGGTTTTCGTTGTTAAAGACATCCACTTTGAAGGTCTGCAACGTGTTGCGGTTGGTGCGGCGCTGC  
TGTCTATGCCGGTTCGTACCGGCGACACCGTGAACGACGAAGACATCTCTAACACCATCCGTGCGCTG  
TTCGCGACCGGCAACTTTGAAGACGTTTCGTGTTCTGCGTGACGGTGACACCCTGCTGGTTCAGGTTAA  
AGAAGTCCGACCATCGCGTCTATCACCTTCTCTGGTAAACAAATCTGTTAAAGACGACATGCTGAAAC  
AGAACCTGGAAGCGTCTGGTGTTCGTGTTGGTGAATCTCTGGACCGTACCACCATCGCGGACATCGAA  
AAAGGTCTGGAAGACTTCTACTACTCTGTTGGTAAATACTCTGCGTCTGTTAAAGCGGTTGTTACCCC  
GCTGCCGCGTAACCGTGTGACCTGAAACTGGTTTTCCAGGAAGGTGTTTCTGCGGAAAATCCAGCAGA  
TCAACATCGTTGGTAACCACGCTTTCACCACCGACGAACCTGATCTCTCACTTCCAACCTGCGTGACGAA  
GTTCCGTGGTGGAACGTGGTTGGTGACCGTAAATACCAGAAACAGAAACTGGCGGGTGACCTGGAAAC  
CCTGCGTTCTTACTACCTGGACCGTGGTTACGCGCGTTTTCAACATCGACTCTACCCAGGTTTTCTCTGA  
CCCCGGACAAAAAAGGTATCTACGTTACCGTGAACATCACCGAAGGTGACCAGTACAAACTGTCTGGT  
GTTGAAGTTTTCTGGTAACCTGGCGGGTCACTCTGCGGAAAATCGAACAACTGACCAAAAATCGAACCGGG  
TGAACGTATAACGGCACCAAAGTTACCAAAAATGGAAGACGACATCAAAAAACTGCTGGGTTCGTTACG  
GTTACGCTTACCCGCGTGTTCAGTCTATGCCGGAATCAACGACGCGGACAAAACCGTTAAACTGCGT  
GTGAACGTGGACGCGGGTAACCGTTTTCTACGTTTCGTAATAATCCGTTTTGAAGGTAACGACACCTCTAA  
AGACGCGGTTCTGCGTCGTGAAATGCGTCAGATGGAAGGTGCGTGGCTGGGTTCTGACCTGGTTGACC  
AGGGTAAAGAACGTCTGAACCGTCTGGGTTTTCTTTGAAACCGTTGACACCGACACCCAGCGTGTTCGG  
GGTTCCCCGGACCAGGTTGACGTTGTTTTACAAAGTTAAAGAACGTAACACCC**GGATCC**TTCAACTTCGG  
TATCGGTTACGGCACCGAATCTGGTGTTCCTTTCCAGGCGGGTGTTCAGCAGGACAACCTGGCTGGGCA  
CCGGTTACGCGGTTGGTATCAACGGCACCAAAAACGACTACCAGACCTACGCGGAACTGTCTGTTACC  
AACCCGTACTTCACCGTTGACGGTGTTCCTCTGGGTGGTTCGTTCTTACAACGACTTCCAGGCGGA  
CGACGCGGACCTGTCTGACTACACCAACAAATCTTACGGCACCGACGTTACCCTGGGTTTCCCGATCA  
ACGAATACAACCTCTCTGCGTGC GGTTCTGGGTTACGTTTACAACCTCTCTGTCTAACATGCAGCCGCGAG  
GTTGCGATGTGGCGTTACCTGTACTCTATGGGTGAACACCCGTTCTACCTCTGACCAGGACAACCTCTTT  
CAAAACCGACGACTTCACCTTCAACTACGGTTGGACCTACAACAAACTGGACCGTGGTTACTTCCCGA  
CCGACGGTTCTCGTGTGAACCTGACCGGCAAAGTTACCATTCCGGGTTCTGACAACGAATACTACAAA  
GTTACCCTGGACACCGCGACCTACGTTCCGATTGACGACGACCACAAATGGGTTGTTCTGGGTTCGTAC  
CCGTTGGGGTTACGGTGACGGTCTGGGTGGTAAAGAAATGCCGTTCTACGAAAACCTTCTACGCGGGTG  
GTTCTTCTACCGTTCGTGGTTTTCCAGTCTAACACCATCGGTCCGAAAGCGGTTTTACTTCCCGCACCGAG  
GCGTCTAACTACGACCCGGACTACGACTACGAATGCGCGACCCAGGACGGTGCGAAAGACCTGTGCAA  
ATCTGACGACGCGGTTGGTGGTAACGCGATGGCGGTTGCGTCTCTGGAATTTATCACCCCGACCCCGT  
TCATCTCTGACAAATACGCGAACTCTGTTTCGTACCTCTTTCTTCTGGGACATGGGCACCGTTTTGGGAC  
ACCAACTGGGACTCTTCTCAGTATTCTGGTTACCCGGACTACTCTGACCCGTCTAACATCCGTATGTC  
TGCGGGTATCGCGCTGCAATGGATGTCTCCGCTGGGGCCCCCTGGTTTTCTTCTTACGCGCAGCCGTTCA  
AAAAATACGACGGTGACAAAGCGGAACAGTTCAGTTCAACATCGGTAAAACCTGGTAATGAGGGCCC  
TTAGTGTTTAGCTATGCTCAACCTTTTAAAGAAGTATGATGGCGATAAGGCTGAGCAATTTCAATTTAA  
TATCGGCAAGACTTGGGGCGGCAGATCT**CTCGAG**

**Figure S1. DNA sequence of *bamA*.** The figure show the DNA sequence of codon optimized *bamA* used in this study. The restriction enzyme recognition sites located within wild-type *E. coli bamA* were purged from the sequence and *NdeI*, *NheI*, *BamHI* and *XhoI* were introduced at the positions indicated (shown as bold and underlined).
