# Supplementary material for: Mutational and Topological Analysis of the Escherichia coli BamA Protein
Source: PubMed Central journal article supplement (PMC3871556; doi:10.1371/journal.pone.0084512), 2013-12-23
Supplement: pone.0084512.s008.pdf [file pone.0084512.s008.pdf]

**Fig. S2.**

```
BamA      MAMKLLIASLLFSSATVYGA-EGFVVKDIHFEGQLQRVAVGAALLSMPVRTGDTVNDEDI
BamA opt  MAMKLLIASLLFSSATVYGASEGFVVKDIHFEGQLQRVAVGAALLSMPVRTGDTVNDEDI
*****

BamA      SNTIRALFATGNFEDVRVLRDGDTLVQVKERPTIASITFSGNKSVKDDMLKQNLASGV
BamA opt  SNTIRALFATGNFEDVRVLRDGDTLVQVKERPTIASITFSGNKSVKDDMLKQNLASGV
*****

BamA      RVGESLDRTTIADIEKGLEDFYYSVGKYSASVKAVVTPLPRNRVDLKLVFQEGVSAEIQQ
BamA opt  RVGESLDRTTIADIEKGLEDFYYSVGKYSASVKAVVTPLPRNRVDLKLVFQEGVSAEIQQ
*****

BamA      INIVGNHAFTTDELISHFQLRDEVPWWNVVGDGRKYQKQKLAGDLETLRSYYLDRGYARFN
BamA opt  INIVGNHAFTTDELISHFQLRDEVPWWNVVGDGRKYQKQKLAGDLETLRSYYLDRGYARFN
*****

BamA      IDSTQVSLTPDKKGIYVTVNI TEGDQYKLSGVEVSGNLAGHSAEIEQLTKIEPGELYNGT
BamA opt  IDSTQVSLTPDKKGIYVTVNI TEGDQYKLSGVEVSGNLAGHSAEIEQLTKIEPGELYNGT
*****

BamA      KVTKMEDDIKLLGRYGYAYPRVQSMPEINDADKTVKLRVNV DAGNRFYVRKIRFEGNDT
BamA opt  KVTKMEDDIKLLGRYGYAYPRVQSMPEINDADKTVKLRVNV DAGNRFYVRKIRFEGNDT
*****

BamA      SKDAVLRREMRQMEGAWLGS DLVDQGKERLNR LGGFFETVDTDTQRVPGSPDQVDVVYKVK
BamA opt  SKDAVLRREMRQMEGAWLGS DLVDQGKERLNR LGGFFETVDTDTQRVPGSPDQVDVVYKVK
*****

BamA      ERNTGSFNFVGIYGTESGVSFQAGVQQDNWLGTGYAVGINGTKNDYQTYAELSVTNPYFT
BamA opt  ERNTGSFNFVGIYGTESGVSFQAGVQQDNWLGTGYAVGINGTKNDYQTYAELSVTNPYFT
*****

BamA      VDGVS LGGRLFY NDFQADDADLSDY TNKSYGTDVTLGFP INEYNSLRAGLGYVHNSLSNM
BamA opt  VDGVS LGGRLFY NDFQADDADLSDY TNKSYGTDVTLGFP INEYNSLRAGLGYVHNSLSNM
*****

BamA      QPQVAMWRYLYSMGEHPSTSDQDNSFKTDDFTFNYGWTYNKLD RGYFPTDGSRVNLTGKV
BamA opt  QPQVAMWRYLYSMGEHPSTSDQDNSFKTDDFTFNYGWTYNKLD RGYFPTDGSRVNLTGKV
*****

BamA      TIPGSDNEYKVTLD TATYVPI DDDHKWVVLGRTRWGYGDGLGGKEMPFYENFYAGGSST
BamA opt  TIPGSDNEYKVTLD TATYVPI DDDHKWVVLGRTRWGYGDGLGGKEMPFYENFYAGGSST
*****

BamA      VRGFQSN TIGPKAVYFPHQASNYDPDYDYECATQDGAKDLCKSDDAVGGNAMAVASLEFI
BamA opt  VRGFQSN TIGPKAVYFPHQASNYDPDYDYECATQDGAKDLCKSDDAVGGNAMAVASLEFI
*****

BamA      TPTPFISDKYANSVRTSFFWDMGT VWD TNWDSSQYSGYPDYSDPSNIRMSAGIALQWMSP
BamA opt  TPTPFISDKYANSVRTSFFWDMGT VWD TNWDSSQYSGYPDYSDPSNIRMSAGIALQWMSP
*****

BamA      LGPLVFSYAQPFFK KYDGDKAEQFQFNIGKTW
BamA opt  LGPLVFSYAQPFFK KYDGDKAEQFQFNIGKTW
*****
```

**Figure S2. Alignment of the BamA sequences.** The figure shows the alignment of the wild-type *E. coli* BamA protein sequence with the codon optimized version of BamA used in the study (BamA opt). Note that the introduction of a *NheI* site into the codon optimized version of *bamA* introduces an additional serine residue after the end of the BamA signal sequence at Ala21. This addition does not affect the activity of BamA.
