# Supplementary material for: Mutational and Topological Analysis of the Escherichia coli BamA Protein
Source: PubMed Central journal article supplement (PMC3871556; doi:10.1371/journal.pone.0084512), 2013-12-23
Supplement: pone.0084512.s010.pdf [file pone.0084512.s010.pdf]

**Fig. S4.**

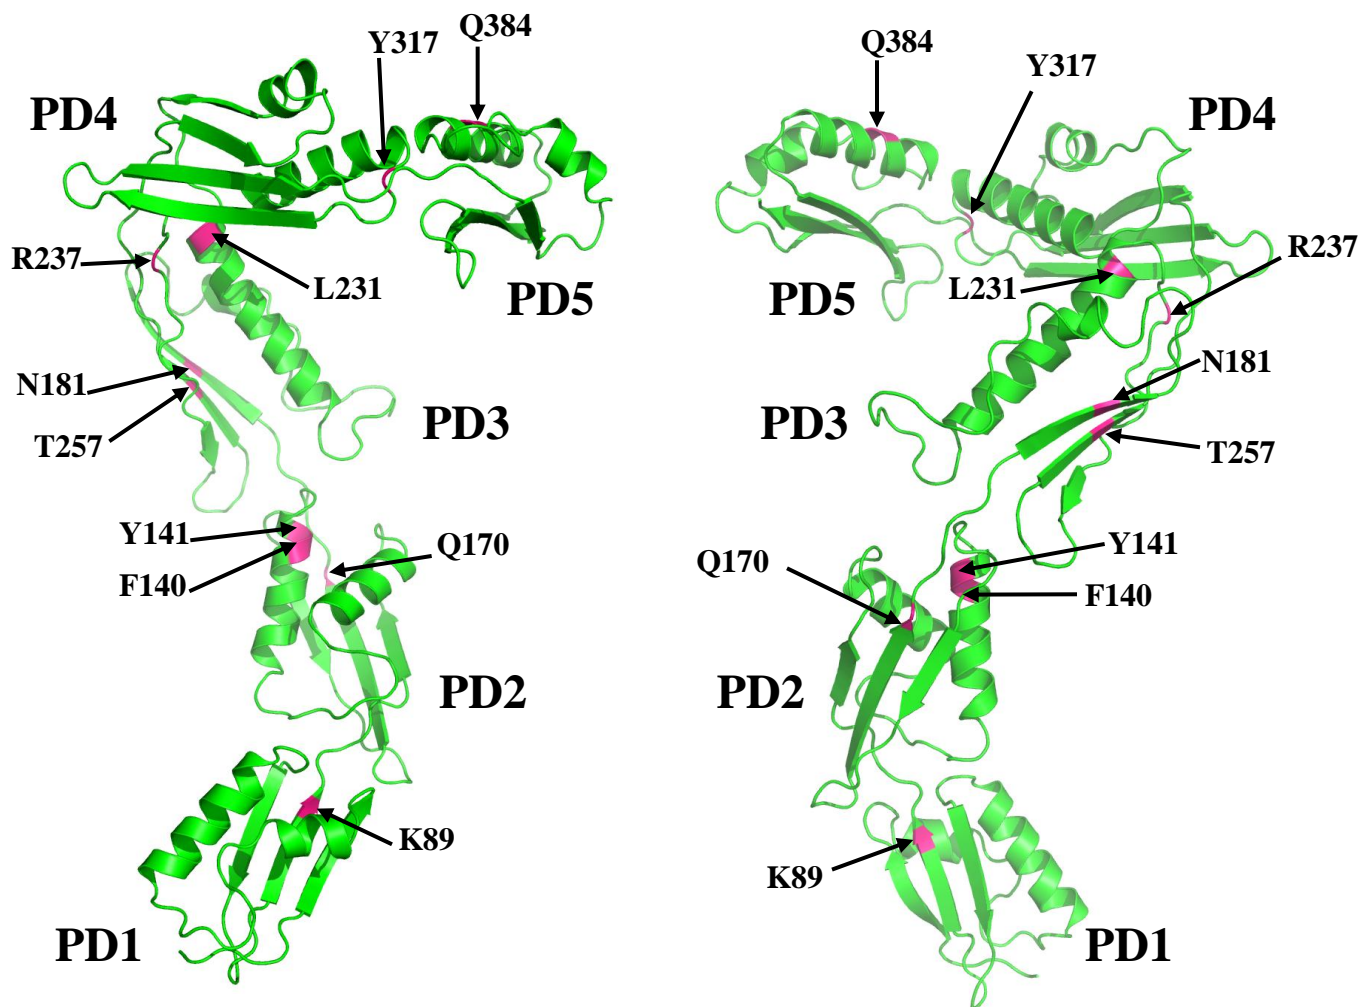

**Figure S4. Location of 5 amino acid insertions within the POTRA domains of BamA.** The figure shows a model displaying the five POTRA domains of BamA (PD1 to PD5) and the location of 5 amino acid insertions (K89, F140, Y141, Q170, N181, L231, R237, T257, Y317 and Q384), which were isolated by linker scanning mutagenesis. N-terminal 6His tags were introduced into these mutant constructs to enable detection using Western blotting (Fig. 1). The model was generated using PyMol [34] by combining the available crystal structures of BamA POTRA<sub>1</sub> to POTRA<sub>4</sub> (3ECF) [8] and POTRA<sub>4</sub> and POTRA<sub>5</sub> (3OG5) [10].
