# Supplementary material for: Mutational and Topological Analysis of the Escherichia coli BamA Protein
Source: PubMed Central journal article supplement (PMC3871556; doi:10.1371/journal.pone.0084512), 2013-12-23
Supplement: pone.0084512.s012.pdf [file pone.0084512.s012.pdf]

**Fig. S6.**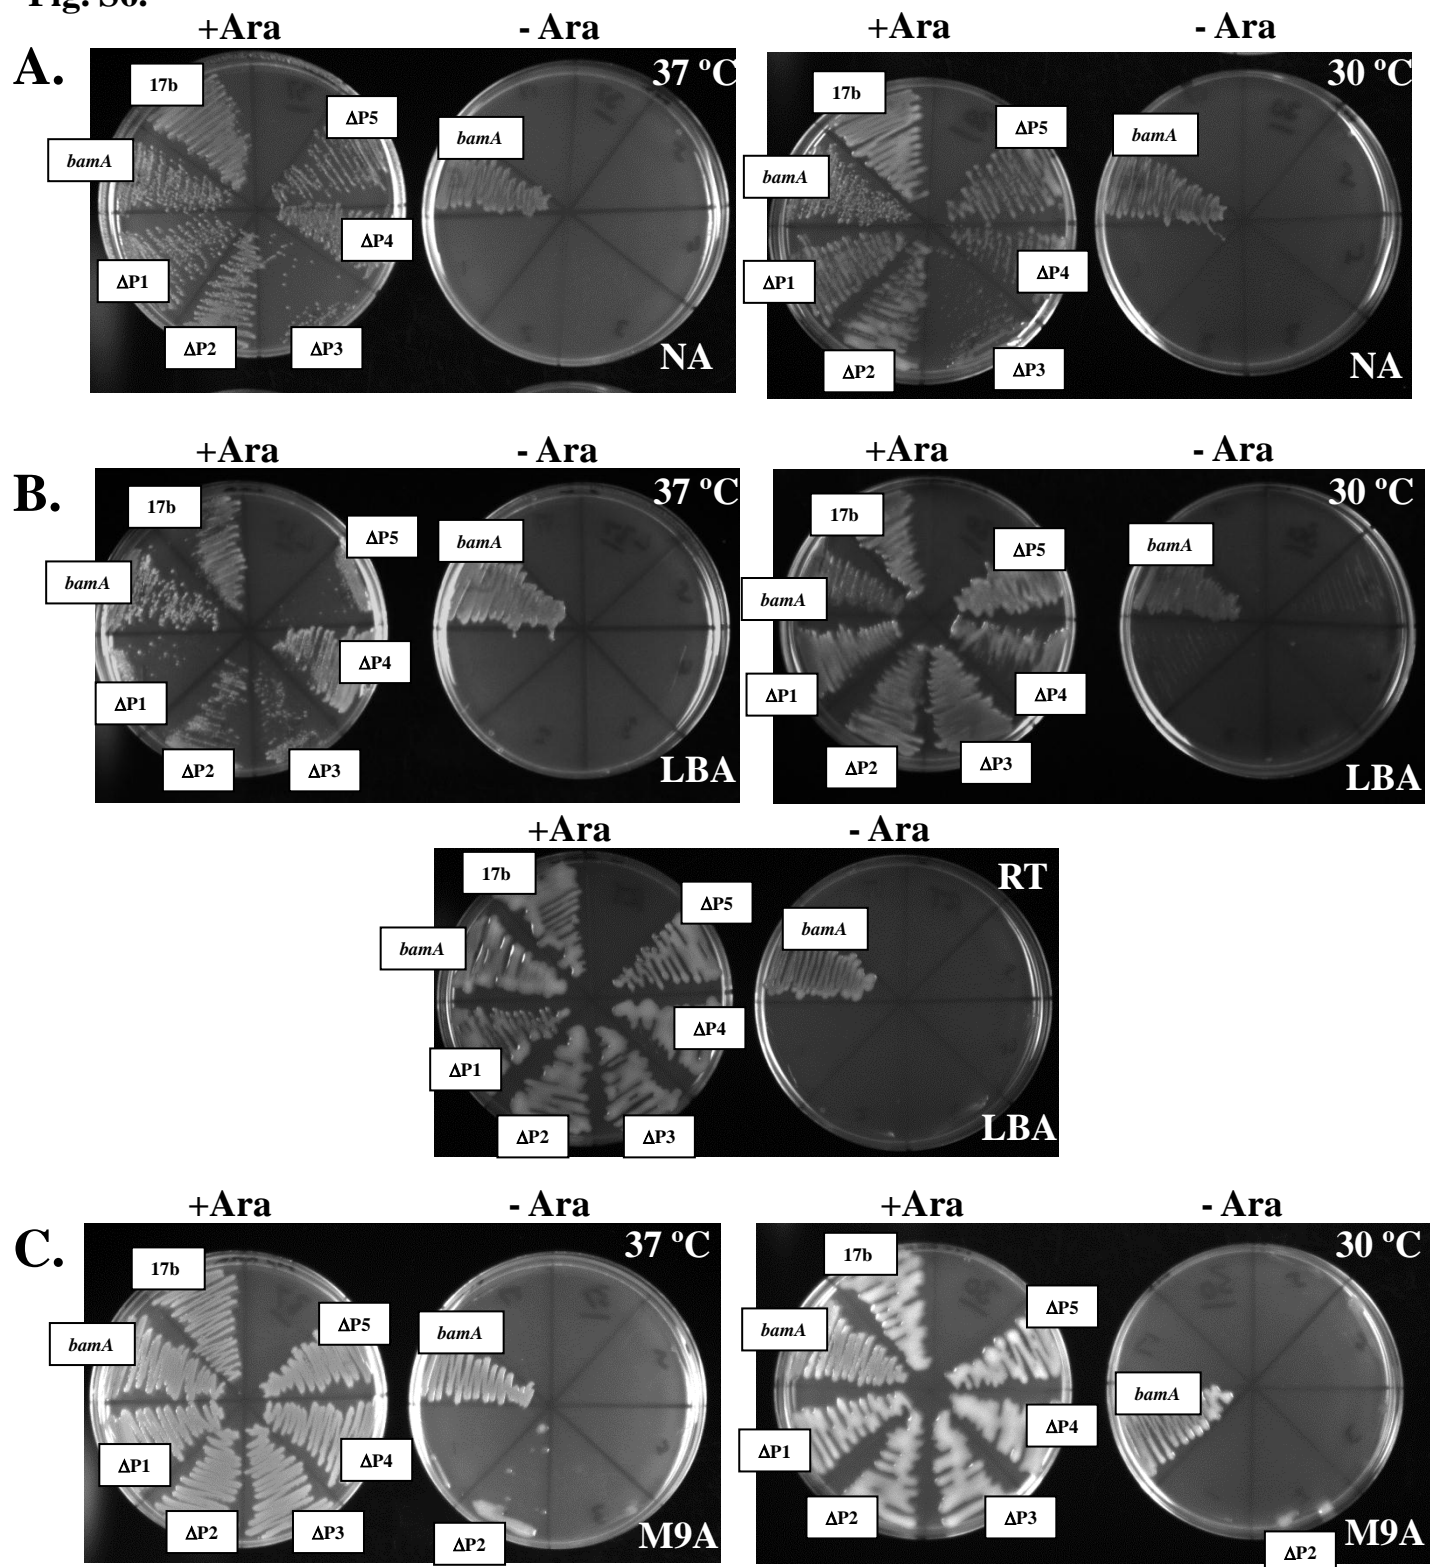

**Figure S6. Depletion analysis of BamA POTRA domains on solid media.** The figure shows the growth of JWD3 cells carrying pET17b, pET17b/ *bamA* or pET17b encoding *bamA* constructs with deletions of each POTRA domain ( $\Delta P1$  to  $\Delta P5$ ). Cells were struck out on to: (A) nutrient agar plates (NA), (B) LB agar plates (LBA) and (C) M9 medium agar plates supplemented with 0.2% glucose (M9A) in the presence or absence of 0.2 % arabinose (+Ara or -Ara). Cells grown on NA and LBA plates were incubated at 37 °C and 30 °C for 20 h, whilst for M9A plates incubation was extended to 40 h. In (B), an additional LBA agar plate was incubated at room temperature (RT) for 4 days.
