# Supplementary material for: Mutational and Topological Analysis of the Escherichia coli BamA Protein
Source: PubMed Central journal article supplement (PMC3871556; doi:10.1371/journal.pone.0084512), 2013-12-23
Supplement: pone.0084512.s015.pdf [file pone.0084512.s015.pdf]

**Fig. S9.**  
**continued.**

|                        | a10          | PD β14                                                                                                        | PD β15 | β1 | β2 | β3 | β4 |
|------------------------|--------------|---------------------------------------------------------------------------------------------------------------|--------|----|----|----|----|
| <i>Escherichia</i>     | 000000000000 | TT                                                                                                            |        |    |    |    |    |
| <i>Escherichia</i>     | 381          | LVDVQGRRLNRLGFFFEVTDIDTQRVPGSDQVDDVYVKVKEKERNTGSENFVFGITGYGTESGVSFQAGVQDQDNLWLGTYAVGTNGTKNLDYQTYAELSVTNPFYFT  |        |    |    |    |    |
| <i>Salmonella</i>      | 381          | LVDVQGRRLNRLGFFFEVTDIDTQRVPGSDQVDDVYVKVKEKERNTGSENFVFGITGYGTESGVSFQAGVQDQDNLWLGTYAVGTNGTKNLDYQTYAELSVTNPFYFT  |        |    |    |    |    |
| <i>Aggregatibacter</i> | 379          | LVEGLKGVRLDRTGFFFEVTSRTRQVVEGTDGDDVDDIYKIKERNITGSENFVFGITGYGTESGLSYQASIKQDNLWLGTYAVGTNGTKNLDYQTYAELSVTNPFYFT  |        |    |    |    |    |
| <i>Haemophilus</i>     | 378          | AVSLAKSRLRLRTGFFFEVEMSMPTVKNLTDGDDVDDIYKIKERNITGSENFVFGITGYGTESGLSYQASIKQDNLWLGTYAVGTNGTKNLDYQTYAELSVTNPFYFT  |        |    |    |    |    |
| <i>Pasteurella</i>     | 375          | LVEGLKGVRLDRTGFFFEVETKTEAIPGSDQVDDVYVKVKEKERNITGSENFVFGITGYGTESGLSYQASIKQDNLWLGTYAVGTNGTKNLDYQTYAELSVTNPFYFT  |        |    |    |    |    |
| <i>Vibrio</i>          | 381          | DIETGKTRLLNRLGFFFEVAVQTVRVPVGGDDVDDVYVKVKEKERNITGSENFVFGITGYGTESGLSYQASIKQDNLWLGTYAVGTNGTKNLDYQTYAELSVTNPFYFT |        |    |    |    |    |
| <i>Pseudomonas</i>     | 380          | LIDQSKARLLRLGFFFEVNVVTEPAVPGTDQVDDVYVKVKEKERNITGSENFVFGITGYGTESGLSYQASIKQDNLWLGTYAVGTNGTKNLDYQTYAELSVTNPFYFT  |        |    |    |    |    |
| <i>Xylella</i>         | 387          | LIDRSKIRLLRLGFFFEVDDVESTVPGSNDQVDDIYVYVKEKERNITGSENFVFGITGYGTESGLSYQASIKQDNLWLGTYAVGTNGTKNLDYQTYAELSVTNPFYFT  |        |    |    |    |    |
| <i>Neisseria</i>       | 381          | KLQRSKRRVLLGFFFDNVQFVDAVLAGTDPKVDLNNLTERSTGSLDLSAGWVQDNLWLGTYAVGTNGTKNLDYQTYAELSVTNPFYFT                      |        |    |    |    |    |
| <i>Agrobacterium</i>   | 393          | VITAAKRRLLALGFFSKVNVSTAVG.SAPDRVIVVVDVDEQSTGSLGIGAGWVQDNLWLGTYAVGTNGTKNLDYQTYAELSVTNPFYFT                     |        |    |    |    |    |
| <i>Rickettsia</i>      | 381          | YIEKGERNLLNLDYFKEVVISLAQT.KAKKDYDNNVEVDEKSTSSIGFDLGYNTAGGLFGRFSLFLERNLVGTGKLLNAGVQVSKNSTSYGCIIDPHFL           |        |    |    |    |    |
| <i>Caulobacter</i>     | 379          | LVDRSKNNMRLGFFFEVETIEDAPG.SAPDRVIVVVDVDEKSTSSIGFDLGYNTAGGLFGRFSLFLERNLVGTGKLLNAGVQVSKNSTSYGCIIDPHFL           |        |    |    |    |    |

|                        | β5  | β6                                                                                                      | β7 |  |
|------------------------|-----|---------------------------------------------------------------------------------------------------------|----|--|
| <i>Escherichia</i>     |     |                                                                                                         |    |  |
| <i>Escherichia</i>     | 480 | VDVGSLGRLEFYNDFAQD...DAD...LSDVYTNKSYGTDVTLGFPINEYNSLRAGTGYVHNSLSNMQPQV...AMWRYLYSMGEHPSTSDQDNS...FKTDD |    |  |
| <i>Salmonella</i>      | 480 | VDVGSLGRLEFYNDFAQD...DAD...LSDVYTNKSYGTDVTLGFPINEYNSLRAGTGYVHNSLSNMQPQI...AMDRYLESMGD.PDASD...FAADD     |    |  |
| <i>Aggregatibacter</i> | 478 | KDVGSLGNIFFYNDYDNS...KNS.TSAAVYARTIYGNLTLGFPVNEANNAYITGLGYAYNKLNITPEY...NRALYLASLNYS...WTFKSHD          |    |  |
| <i>Haemophilus</i>     | 477 | KDVGSLGNIFFYNDYDNS...ARK.ASAAVYKRRITYGASGTLGFPVDENSSYLGLGYTHDKLRNVREY...TREKYNMCKE.PINPQNSHYDRISQAD     |    |  |
| <i>Pasteurella</i>     | 473 | KDVGSLGNVFSFEEDYSS...KNS.TSAGYGRTYGNTLTLGFPVNEANSYILGYTYNKLKNTAPEY...NRDLYRQSMKNYS...WTFKSHD            |    |  |
| <i>Vibrio</i>          | 480 | LDVGSGLGKVFYQNFYAS...EAG.IVYVYTNESYGTSLTLGFPVDELNRFEEFITYGTHNKIGNLTPYL...QVENFLAAQASINDSG...NLLTDD      |    |  |
| <i>Pseudomonas</i>     | 479 | LDVGSGLGYNAFYRKTVDYDEL.DVD...VAQYVSNVSLGAGMISIGYPIETSRRLTYGLISVQRDQIDTGRYTVDEIYDLDKEDG...NF...TN        |    |  |
| <i>Xylella</i>         | 486 | DNGVSLGYNLAYQKLDYS...DFN.AAAYNSKRMSSGQITGFPITENDTVSVMYIADSNQITIFPGST.PKAIIDYLDVAGQR...F...RA            |    |  |
| <i>Neisseria</i>       | 480 | ADVGSGLGYDIYKAFDRPKA.ST...SVKQYKTTTAEQGLVVRMGIPTVEYDRVNFLLAAEHLVNTYNKA...PKRYADFKYQKTDGADG...SFKGLL     |    |  |
| <i>Agrobacterium</i>   | 492 | GYRLAAGFDLFSQSRSEYDYD...EQGFALRVYVAPITENLSTTFKYTYKQLNYDGECD...WETGSNLAGYKDLIRGGD...W...TQ               |    |  |
| <i>Rickettsia</i>      | 479 | DRDLSSLVNAFRN.YTGRGASVNLNTDQSYKXLSLGVKISLGYDMKEDLSHEIDYLIKRDILSAPSPSN...SIFLNEQMGK...L...IT             |    |  |
| <i>Caulobacter</i>     | 477 | GRNLVAGVNLVYTFRYDLYSE...FAAYDTKSVGGDVRGFPFLINDSSMSLRVTVRQDEVSVADSLCASGSVQITLCLQRGA...V...IT             |    |  |

|                        | β8  | β9                                                                                                   | β10 | β11 |
|------------------------|-----|------------------------------------------------------------------------------------------------------|-----|-----|
| <i>Escherichia</i>     |     |                                                                                                      |     |     |
| <i>Escherichia</i>     | 570 | FTFNYGWIYKLDGRGYFPTDGSRVNLTGKVTIPGSDNEYKVVTLDTATYVPIDDDHK...WVVLGRTRWGYG.DGLG...E...MPFFY            |     |     |
| <i>Salmonella</i>      | 565 | FTFNYGWIYKLDGRGYFPTDGSRVNLTGKVTIPGSDNEYKVVSLDTATYVPIIDNDHK...WVVLGRTRWGYG.DGLG...E...MPFFY           |     |     |
| <i>Aggregatibacter</i> | 563 | YDISFGWNYSLNRRGFPTKGGKASISGKLTIPGSDNKYYKLNADVQGFYPLNRDQT...WVLSGRLGAAYANGFG...RLPFY                  |     |     |
| <i>Haemophilus</i>     | 569 | FDLISFGWNYSLNRRGYFPTAGSSANISGKLTIPGSDNKYYVGTNFGSFPILNSEHK...WVVIATKGGGLAYT.NSFG...E...VPFFY          |     |     |
| <i>Pasteurella</i>     | 559 | FDLISFGWNYSLNRRGYFPTKGVANISGKLTIPGSDNKYYKLNAAEQGFYPLDRHG...WVLSRISASFA.DGFS...RLPFY                  |     |     |
| <i>Vibrio</i>          | 567 | FIDINLSWTRNLLNNSYFPTAGNHQRAFYKMTVPGSDAQYFKLQYDVRGYFPLTKHEFFLRLGRLYGNGY.G.Q.TD...DNLFPFY              |     |     |
| <i>Pseudomonas</i>     | 561 | FKASIGWSEITLNGKGLVTRGHQSQTLTLETTLPGSDKYYKIDYRQGVFAPLTDN...YTMRFHTELGYG.D.GY...RLPFY                  |     |     |
| <i>Xylella</i>         | 568 | WRTELGWARDTRNDYFMPNLCMYQRLTGAETVLPGSDTIKYYNIIYQISKVYPIIPA...LVNTRLEVGYG.D.DY...SHSTRILPDGIVATASGLPFF |     |     |
| <i>Neisseria</i>       | 570 | YKGTIVGWRNKTDLSALWPTRGYLTGVNABIALPGLKQYYSATHNQTFVPLSKT...FTMLGGEVGLA.G.GY...TK...E...IPFF            |     |     |
| <i>Agrobacterium</i>   | 572 | SIINLNTLNLDDRNMPREGWQAAITNEFAGLGGSEYKIKYAKARFYKTLSD...YDVIIGSLTGOAGHVLGTD...NLLVF                    |     |     |
| <i>Rickettsia</i>      | 560 | SAIGHITTYDQTDNKIVPKNGVLSVGTQEFAGVGGDNKYIKHEIECKFYKSFINN...VTLKLSAA.GGDMAGLGG...MVRIS                 |     |     |
| <i>Caulobacter</i>     | 557 | SLIYGLRITDKRNDPINTRGWFADLNQDLAGVGGDVKYLKTEADAGWYVGFTKD...LVFSATGSFGLIEGWG...NVRIN                    |     |     |

|                        | L6 β1 | L6 β2                                                                                                   | TT | β12 | β13 |
|------------------------|-------|---------------------------------------------------------------------------------------------------------|----|-----|-----|
| <i>Escherichia</i>     |       |                                                                                                         |    |     |     |
| <i>Escherichia</i>     | 650   | ENFYAGGSSIVRGFQSNITGPKAVYFPHQASNYDPPDYDIECATQDGAKDLCKSDDAVGGNAMAVASLEFIFTPTFFISDKYANSVRISFVDMGTWVDT.N   |    |     |     |
| <i>Salmonella</i>      | 645   | ENFYAGGSSIVRGFQSNITGPKAVYKNGAHTSWGDDNDYEDCTQ...SGCKDDAVGGNAMAVASLEFIFTPTFFISDKYANSVRISFVDMGTWVDT.N      |    |     |     |
| <i>Aggregatibacter</i> | 643   | QTYTAGGIGSIRGFAYSALTPQAIYINPRVWCSGSSG.VNV.NSSC...YVINGDDAVGGNAMAVASLEFIFTPTFFVFAEKQNSVRSFVDMGTWVDT.H    |    |     |     |
| <i>Haemophilus</i>     | 649   | QLYSAGGIGSIRGFAYGALTPGNAIYRTRQCPDS...FKAPQDDVIGGNAMVNASLELITPAPFISDKYANVRSFVDMGTWVDT.K                  |    |     |     |
| <i>Pasteurella</i>     | 639   | QYYSAGGIGSIRGFAYSALTPGNAIYRTRQCPDS...YCLVSSDDVIGGNAMVNASLELITVPTFFVADKNQNSVRSFVDMGTWVDT.E               |    |     |     |
| <i>Vibrio</i>          | 652   | ENFYAGGFTSIRGFQSNITGPKAVYRSDYSGSNNG...SDTADDDVIGGNAMVNASLELITVPTFFVASEARNQVRSFVDMGTWVDT.E               |    |     |     |
| <i>Pseudomonas</i>     | 640   | ENFYAGGFNSVRGFQKDSLTPGPRSTPVSARDANGNRLPDGVPDSKGRYTDPPQDEPAFGGNNILITGGAELELTPFFVFKQ...QLRLRSLVDMGTWVDT.D |    |     |     |
| <i>Xylella</i>         | 660   | ENFYAGGNTSVRGFRDNTLTPRSEVTAL...YNGQCPGCGSFKTVGSTEMFYEPKLFDS...PSARISAFIDDFGNVNG...D                     |    |     |     |
| <i>Neisseria</i>       | 649   | ENFYAGGLGVRGYESENTLTPKRYVDE...YGERKISYGGNKKANVSALELTPFFVGA...ARIVRSLSLFADAGSVWVDMGR...D                 |    |     |     |
| <i>Agrobacterium</i>   | 651   | QDFKFGGR.QVRGFKNDDGTPRI...GSDSISGGTITYFAASAEVTA...GSLRAGFVDMGTWVDT.H                                    |    |     |     |
| <i>Rickettsia</i>      | 639   | DRFVLCGDY.SIRGFASGCVGPRRKN...TNEGLGGERYVTFSTELNFT...VPEE...FNFTGAVFIDDLGVSVMGVG...D                     |    |     |     |
| <i>Caulobacter</i>     | 635   | DRFVYRGGT.SIRGFETIAGTTPRDIS...SFEVNSMGAKLYAISTFELTV...LPEE...YGIKAALEFSDVGTAGLLDD...D                   |    |     |     |

|                        | β14 | β15                                                                      | β16 |  |
|------------------------|-----|--------------------------------------------------------------------------|-----|--|
| <i>Escherichia</i>     |     |                                                                          |     |  |
| <i>Escherichia</i>     | 749 | WDSS...QYSG...YPDYSDPSNIRMSAGIATQWMSPLGPLVFSYAQPFKKYDGDKAEQFQFNIGKTW.    |     |  |
| <i>Salmonella</i>      | 741 | WDPS...SAPSD...VPDYSDPNNIRMSAGIALQWMSPLGPLVFSYAQPFKKYDGDKAEQFQFNIGKTW.   |     |  |
| <i>Aggregatibacter</i> | 738 | WKGE...KAKFTNLKLPDYGDPKVRASAGIAFQWQSPIGPLVFSYAKPIKKYENDDIEQFQFSIGGSS.    |     |  |
| <i>Haemophilus</i>     | 730 | WKQS...KADYPN...LPDFDGYKVRASAGIALQWQSPIGPLVFSYAKPIKKYAGDIEQFQFIVGSI.     |     |  |
| <i>Pasteurella</i>     | 723 | WKAE...DKAKFAKLNVPDYSDPKVRASAGVALLQWQSPIGPLVFSYAKPIKKYQDIEQFQFSIGGTF.    |     |  |
| <i>Vibrio</i>          | 737 | FDYR...GKADYGNQYYDYSDPNTNVRASAGVALLQWQSPMGPLVFSYAKPIKKYEGDIEEFQFQFIVGSI. |     |  |
| <i>Pseudomonas</i>     | 737 | CPTK...TTTNCDDGI.KTDNIASSVGVGLTWITALGPLVFSYAKPIKKNPDNAETQVQFQFSLGQTF.    |     |  |
| <i>Xylella</i>         | 732 | ...VNNF.KANEIRASAGVALLWRAPIGPISISYAFPIKKNENDEIERLOFTFGGQF.               |     |  |
| <i>Neisseria</i>       | 722 | TYTAAENGNKSVYSE.NAHKSTFTNELRYSAGGAVTWLSPLGPKFSYAPLKKKPEDEIQRQFQGLGTF.    |     |  |
| <i>Agrobacterium</i>   | 718 | VKIG...SGETLQDDNSIRASAGIIVMWA...SFGPIRVDYVPIAKEDYDEQRFRFGMSNT.           |     |  |
| <i>Rickettsia</i>      | 707 | LNKK...QY...KTPNGFYNDQSIRASAGVGFETVWTRFAPIRMDWGFPIKKNQYDDTQNFHLRFSTHL.   |     |  |
| <i>Caulobacter</i>     | 705 | VDRQ...RSPGVDPNICKDNLGIRASAGIISDWKSPMGPPIRFDISRILSKEDYDRTETFRFSTSTREFQ.  |     |  |

**Figure S9. Alignment of BamA/ Omp85 orthologues.** The figure shows the alignment of *E. coli* K-12 BamA (GenBank AAC73288) with the BamA/ Omp85 orthologues from *Salmonella enterica serovar Typhi* (GenBank CAD08682), *Aggregatibacter actinomycetemcomitans* (GenBank ACX81664), *Haemophilus ducreyi* (GenBank AAP96041), *Pasteurella multocida* (GenBank AAC44600), *Vibrio cholerae* (GenBank AAF95396), *Pseudomonas aeruginosa* (GenBank ABR83527), *Xylella fastidiosa* (GenBank AAF83856), *Neisseria gonorrhoeae* (GenBank ACF31073), *Agrobacterium tumefaciens* (WP003512849), *Rickettsia prowazekii* (GenBank CAA14627), *Caulobacter crescentus* (GenBank AAK23890). Secondary structure, derived from our model predications (Fig. 2), is indicated above the alignment. POTRA domain  $\beta$ -strands are designated PD  $\beta$ 1 to PD  $\beta$ 15, whilst those in the  $\beta$ -barrel are labelled  $\beta$ 1 to  $\beta$ 16. Predicted  $\beta$ -strands in loop L6 are labelled as L6  $\beta$ 1 and L6  $\beta$ 2.
