# Supplementary material for: Mutational and Topological Analysis of the Escherichia coli BamA Protein
Source: PLoS One. 2013 Dec 23;8(12):e84512. doi: 10.1371/journal.pone.0084512 (PMC3871556; doi:10.1371/journal.pone.0084512)
Supplement: Table S4 — 6His tagged BamA insertions. (PDF) [file pone.0084512.s004.pdf]

**Table S4. 6His tagged BamA insertions.**

| Location of 5 amino acid insertions in BamA. | BamA secondary structure affected. | Growth in absence of arabinose. <sup>a)</sup> | Maximum vancomycin concentration allowing growth. <sup>b)</sup> |
|----------------------------------------------|------------------------------------|-----------------------------------------------|-----------------------------------------------------------------|
| pET17b                                       | n/a                                | -                                             | -                                                               |
| <i>6hisbamA</i>                              | n/a                                | +                                             | 150                                                             |
| K89                                          | POTRA 1                            | +/-                                           | 0                                                               |
| F140                                         | POTRA 2                            | -                                             | nd                                                              |
| Y141                                         | POTRA 2                            | +                                             | 0                                                               |
| Q170                                         | POTRA 2                            | +                                             | 0                                                               |
| N181                                         | POTRA 3                            | -                                             | nd                                                              |
| L231                                         | POTRA 3                            | -                                             | nd                                                              |
| R237                                         | POTRA 3                            | -                                             | nd                                                              |
| T257                                         | POTRA 3                            | -                                             | nd                                                              |
| Y317                                         | POTRA 4                            | +                                             | 37.5                                                            |
| Q384                                         | POTRA 5                            | +                                             | 37.5                                                            |
| Q441                                         | Beta 2                             | -                                             | nd                                                              |
| Q466                                         | Loop 2/ Beta 4                     | -                                             | nd                                                              |
| D503                                         | Loop 3/ Beta 6                     | -                                             | nd                                                              |
| Y509                                         | Beta 6                             | -                                             | nd                                                              |
| W546                                         | Loop 4                             | -                                             | nd                                                              |
| Y574                                         | Beta 8                             | -                                             | nd                                                              |
| L613                                         | Beta 10                            | -                                             | nd                                                              |
| Q664                                         | Loop 6                             | -                                             | nd                                                              |
| N666                                         | Loop 6                             | -                                             | nd                                                              |
| A714                                         | Beta 12                            | -                                             | nd                                                              |
| A770                                         | Beta 14                            | -                                             | nd                                                              |
| Q789                                         | Beta 15                            | -                                             | nd                                                              |
| A799                                         | Loop 8                             | -                                             | nd                                                              |

<sup>a)</sup> The growth of the depletion strain JWD3, carrying either pET17b, pET17b/ *6hisbamA* or pET17b/ *6hisbamA* containing various insertions in *bamA*, was investigated by streaking bacteria onto nutrient agar plates supplemented with only 100  $\mu\text{g ml}^{-1}$  ampicillin. Plates were incubated overnight at 37 °C and strains were scored as follows: +, normal growth; +/-, weak growth; -, no growth. The results shown were determined from three independent experiments.

<sup>b)</sup> JWD3 cells containing version of pET17b/ *6hisbamA*, which enabled cells to grow in the absence of arabinose, were struck onto LB agar plates supplemented with 100  $\mu\text{g ml}^{-1}$  ampicillin and 0, 37.5, 75 and 150  $\mu\text{g ml}^{-1}$  vancomycin. Plates were incubated overnight at 37 °C. Constructs that were not tested are indicated as nd (not determined). The results shown were determined from three independent experiments.
