# Supplementary material for: Mutational and Topological Analysis of the Escherichia coli BamA Protein
Source: PLoS One. 2013 Dec 23;8(12):e84512. doi: 10.1371/journal.pone.0084512 (PMC3871556; doi:10.1371/journal.pone.0084512)
Supplement: Table S6 — 6His tagged BamA barrel loop deletions. (PDF) [file pone.0084512.s006.pdf]

**Table S6. 6His tagged BamA barrel loop deletions.**

| Loop deleted.   | Growth in absence of arabinose. <sup>a)</sup> | Maximum vancomycin concentration allowing growth. <sup>b)</sup> |
|-----------------|-----------------------------------------------|-----------------------------------------------------------------|
| pET17b          | -                                             | -                                                               |
| <i>6hisbamA</i> | +                                             | 150                                                             |
| $\Delta$ L3     | +                                             | 75                                                              |
| $\Delta$ L4     | -                                             | nd                                                              |
| $\Delta$ L6     | -                                             | nd                                                              |
| $\Delta$ L7     | +/-                                           | 0                                                               |
| $\Delta$ L8     | +                                             | 0                                                               |

<sup>a)</sup> Growth of the depletion strain JWD3, carrying either pET17b, pET17b/ *6hisbamA* or pET17b/ *6hisbamA* containing various loop deletions within *bamA*, was investigated by streaking bacteria onto nutrient agar plates supplemented with only 100  $\mu\text{g ml}^{-1}$  ampicillin. Plates were incubated overnight at 37 °C and strains were scored as follows: +, normal growth; +/-, weak growth; -, no growth. The results shown were determined from three independent experiments.

<sup>b)</sup> JWD3 cells containing the versions of pET17b/ *6hisbamA*, which enabled cells to grow in the absence of arabinose, were struck out onto LB agar plates supplemented with 100  $\mu\text{g ml}^{-1}$  ampicillin and 0, 37.5, 75 and 150  $\mu\text{g ml}^{-1}$  vancomycin. Plates were incubated overnight at 37 °C. Constructs that were not tested are indicated as nd (not determined). The results shown were determined from three independent experiments.
